# Supplementary material for: Indirect growth of mesoporous Bi@C core–shell nanowires for enhanced lithium-ion storage
Source: Royal Society of Chemistry journal article supplement (doi:10.1039/c4nr04378b), 2014-01-01
Supplement: c4nr04378b1.pdf [file c4nr04378b1.pdf]

Supporting information

## **Indirect Growth of Mesoporous Bi@C Core-shell Nanowires for Enhanced Lithium-Ion Storage**

*Rui Dai, Yuhang Wang, Peimei Da, Hao Wu, Ming Xu and Gengfeng Zheng\**

*Address: Laboratory of Advanced Materials, Department of Chemistry, Fudan University, Shanghai,  
200433, People's Republic of China*

*E-mail: [gfzheng@fudan.edu.cn](mailto:gfzheng@fudan.edu.cn)*

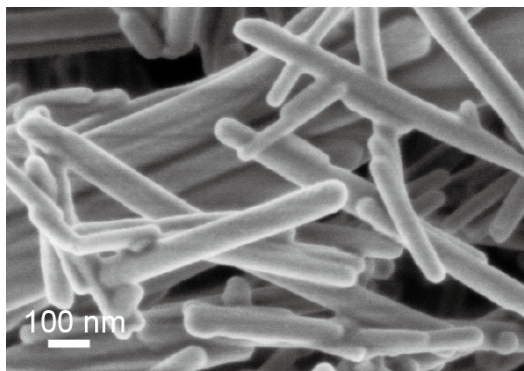

**Fig. S1** SEM images of Bi<sub>2</sub>S<sub>3</sub>@GCP nanowires before calcination.

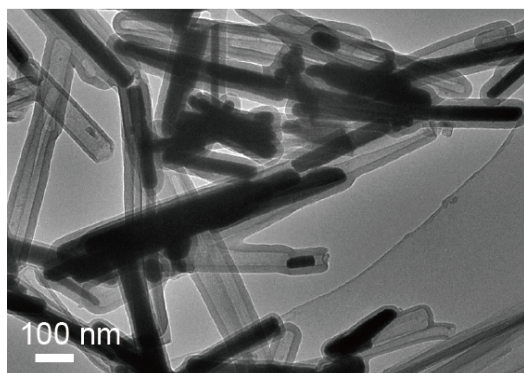

**Fig. S2** TEM images of Bi@C core-shell NWs exhibiting a relatively larger area.

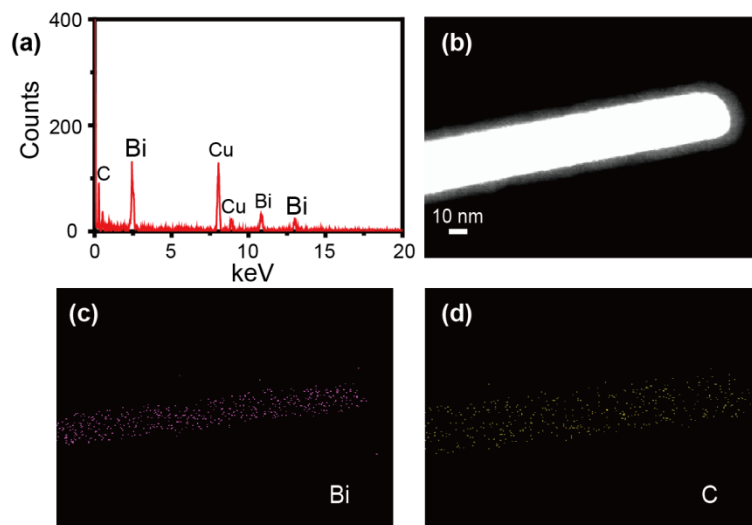

**Fig. S3** (a) EDX spectrum of Bi@C core-shell nanowires ; (b) STEM image of Bi@C core-shell nanowires; (c, d) Corresponding elemental mapping of Bi and C elements in Bi@C core-shell nanowires, respectively.

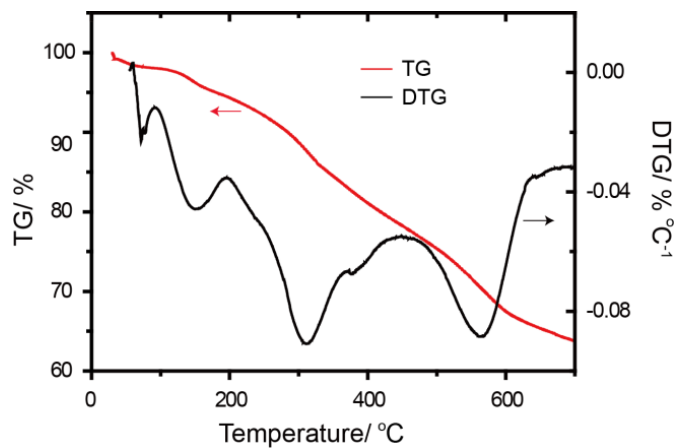

**Fig. S4** Thermogravimetric results of Bi<sub>2</sub>S<sub>3</sub>@GCP nanowires under N<sub>2</sub> atmosphere.

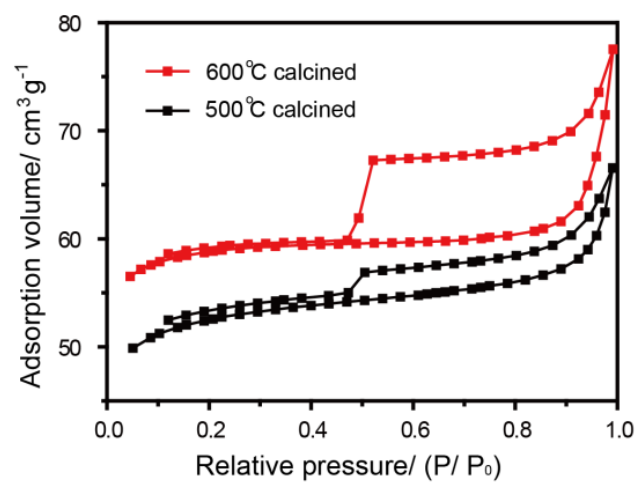

**Fig. S5** N<sub>2</sub> sorption isotherms of the Bi<sub>2</sub>S<sub>3</sub>@GCP nanowires calcined at 500 and 600 °C, respectively.

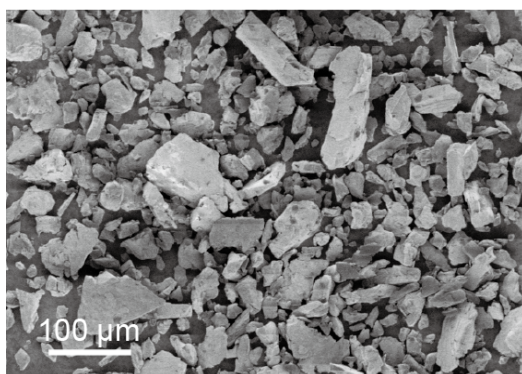

**Fig. S6** SEM images of commercial Bi microparticles.

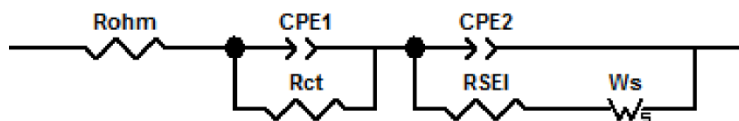

**Fig. S7** Equivalent circuit model.  $R_{ohm}$  denotes the internal resistance of the test cell.  $R_{ct}$  is related to the charge-transfer resistance.  $R_{SEI}$  represents the interphase resistance. CPE represents the constant phase element.  $W_s$  represents the Warburg impedance.

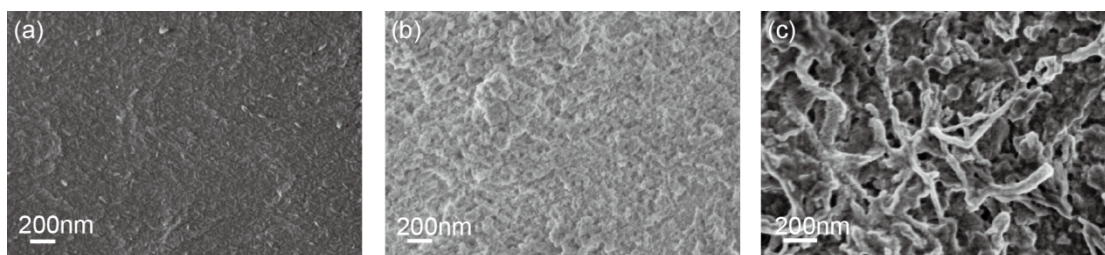

**Fig. S8** SEM images of electrodes fabricated from (a) commercial Bi microparticles, (b)  $Bi_2S_3@C$  core-shell nanowires, and (c)  $Bi@C$  core-shell nanowires collected after 10 charge/discharge cycles.
